# Supplementary material
Source: HighWire-hosted journal article supplement (https://bmjopen.bmj.com/content/9/6/e025228)
Supplement: inline-supplementary-material-1 [file inline-supplementary-material-1.pdf]

## Appendix 1: Objectives, Outcomes, Hypothesis and Methods of Analysis

| Objectives                                                                                          | Outcomes                                                                                       | Hypothesis                                                                    | Methods of Analysis                                                                                              |
|-----------------------------------------------------------------------------------------------------|------------------------------------------------------------------------------------------------|-------------------------------------------------------------------------------|------------------------------------------------------------------------------------------------------------------|
| 1) <b>Primary:</b> To compare the effects of <i>Lactobacillus rhamnosus</i> GG versus placebo on:   | Ventilator-associated pneumonia (VAP)                                                          | <i>Lactobacillus rhamnosus</i> GG will reduce the risk of the primary outcome | Cox proportional hazards                                                                                         |
| 2) <b>Secondary:</b> To compare the effects of <i>Lactobacillus rhamnosus</i> GG versus placebo on: | a) Early VAP, late VAP, post-ventilation ICU-acquired pneumonia, and a composite of all three. | <i>Lactobacillus rhamnosus</i> GG will reduce the risk                        | Cox proportional hazards                                                                                         |
|                                                                                                     | b) <i>Clostridium difficile</i>                                                                | <i>Lactobacillus rhamnosus</i> GG will reduce the risk                        | Cox proportional hazards                                                                                         |
|                                                                                                     | c) Any infection acquired during the ICU stay                                                  | <i>Lactobacillus rhamnosus</i> GG will reduce the risk                        | Cox proportional hazards                                                                                         |
|                                                                                                     | d) Diarrhea in the ICU                                                                         | <i>Lactobacillus rhamnosus</i> GG will reduce the risk                        | Cox proportional hazards                                                                                         |
|                                                                                                     | e) Antibiotic-associated diarrhea                                                              | <i>Lactobacillus rhamnosus</i> GG will reduce the risk                        | Cox proportional hazards                                                                                         |
|                                                                                                     | f) Antimicrobial use                                                                           | <i>Lactobacillus rhamnosus</i> GG will reduce the risk                        | Independent samples paired t-test or Wilcoxon rank sum test                                                      |
|                                                                                                     | g) Duration of mechanical ventilation, ICU stay and hospital stay                              | <i>Lactobacillus rhamnosus</i> GG will have no effect                         | Independent samples paired t-test or Wilcoxon rank sum test                                                      |
|                                                                                                     | h) ICU mortality and hospital mortality                                                        | <i>Lactobacillus rhamnosus</i> GG will have no effect                         | Cox proportional hazards                                                                                         |
|                                                                                                     | i) Serious adverse events                                                                      | <i>Lactobacillus rhamnosus</i> GG will have no effect                         | Cox proportional hazards                                                                                         |
| 3) <b>Sensitivity Analyses:</b>                                                                     |                                                                                                |                                                                               |                                                                                                                  |
| i. Compare proportion of patients with VAP in the two groups.                                       | VAP                                                                                            | Results remain robust                                                         | <ul style="list-style-type: none"> <li>i. Mantel-Haenszel Chi square test</li> <li>ii. Competing risk</li> </ul> |

|      |                                                                             |     |                                                                                                   |                                                                                                                                                                                                   |
|------|-----------------------------------------------------------------------------|-----|---------------------------------------------------------------------------------------------------|---------------------------------------------------------------------------------------------------------------------------------------------------------------------------------------------------|
| ii.  | Check for competing risk of death                                           |     |                                                                                                   | analysis                                                                                                                                                                                          |
| iii. | Efficacy analysis                                                           |     |                                                                                                   | iii. Cox proportional hazards                                                                                                                                                                     |
| iv.  | Include all VAP events that occur after the day of randomization            |     |                                                                                                   | iv. Cox proportional hazards                                                                                                                                                                      |
| 4)   | <b><u>Subgroup Analyses:</u></b>                                            |     |                                                                                                   | Cox proportional hazards with interaction test between each subgroup variable and treatment group evaluating the credibility of subgroup findings using our 11 previously published criteria [60] |
| i.   | Medical vs surgical vs trauma patients                                      | VAP | Treatment effects may be attenuated in one group compared to another group (see text for details) |                                                                                                                                                                                                   |
| ii.  | >75 years vs 65 – 75 years vs <65 years old                                 |     |                                                                                                   |                                                                                                                                                                                                   |
| iii. | Frail patients versus not frail patients                                    |     |                                                                                                   |                                                                                                                                                                                                   |
| iv.  | Antibiotics prior to randomization vs no antibiotics prior to randomization |     |                                                                                                   |                                                                                                                                                                                                   |
| v.   | Pneumonia at baseline vs no pneumonia                                       |     |                                                                                                   |                                                                                                                                                                                                   |

**Legend for Appendix 1:** In all analyses, results will be expressed as estimate of effect, corresponding 95% and associated p-values. All tests will be two-sided using  $\alpha = 0.05$  level of significance in accordance with a superiority hypotheses.
